# Supplementary material for: DNA Polymerase B1 Binding Protein 1 Is Important for DNA Repair by Holoenzyme PolB1 in the Extremely Thermophilic Crenarchaeon Sulfolobus acidocaldarius
Source: Microorganisms. 2021 Feb 20;9(2):439. doi: 10.3390/microorganisms9020439 (PMC7923795; doi:10.3390/microorganisms9020439)
Supplement: Supplementary file 1 [file microorganisms-09-00439-s001.pdf]

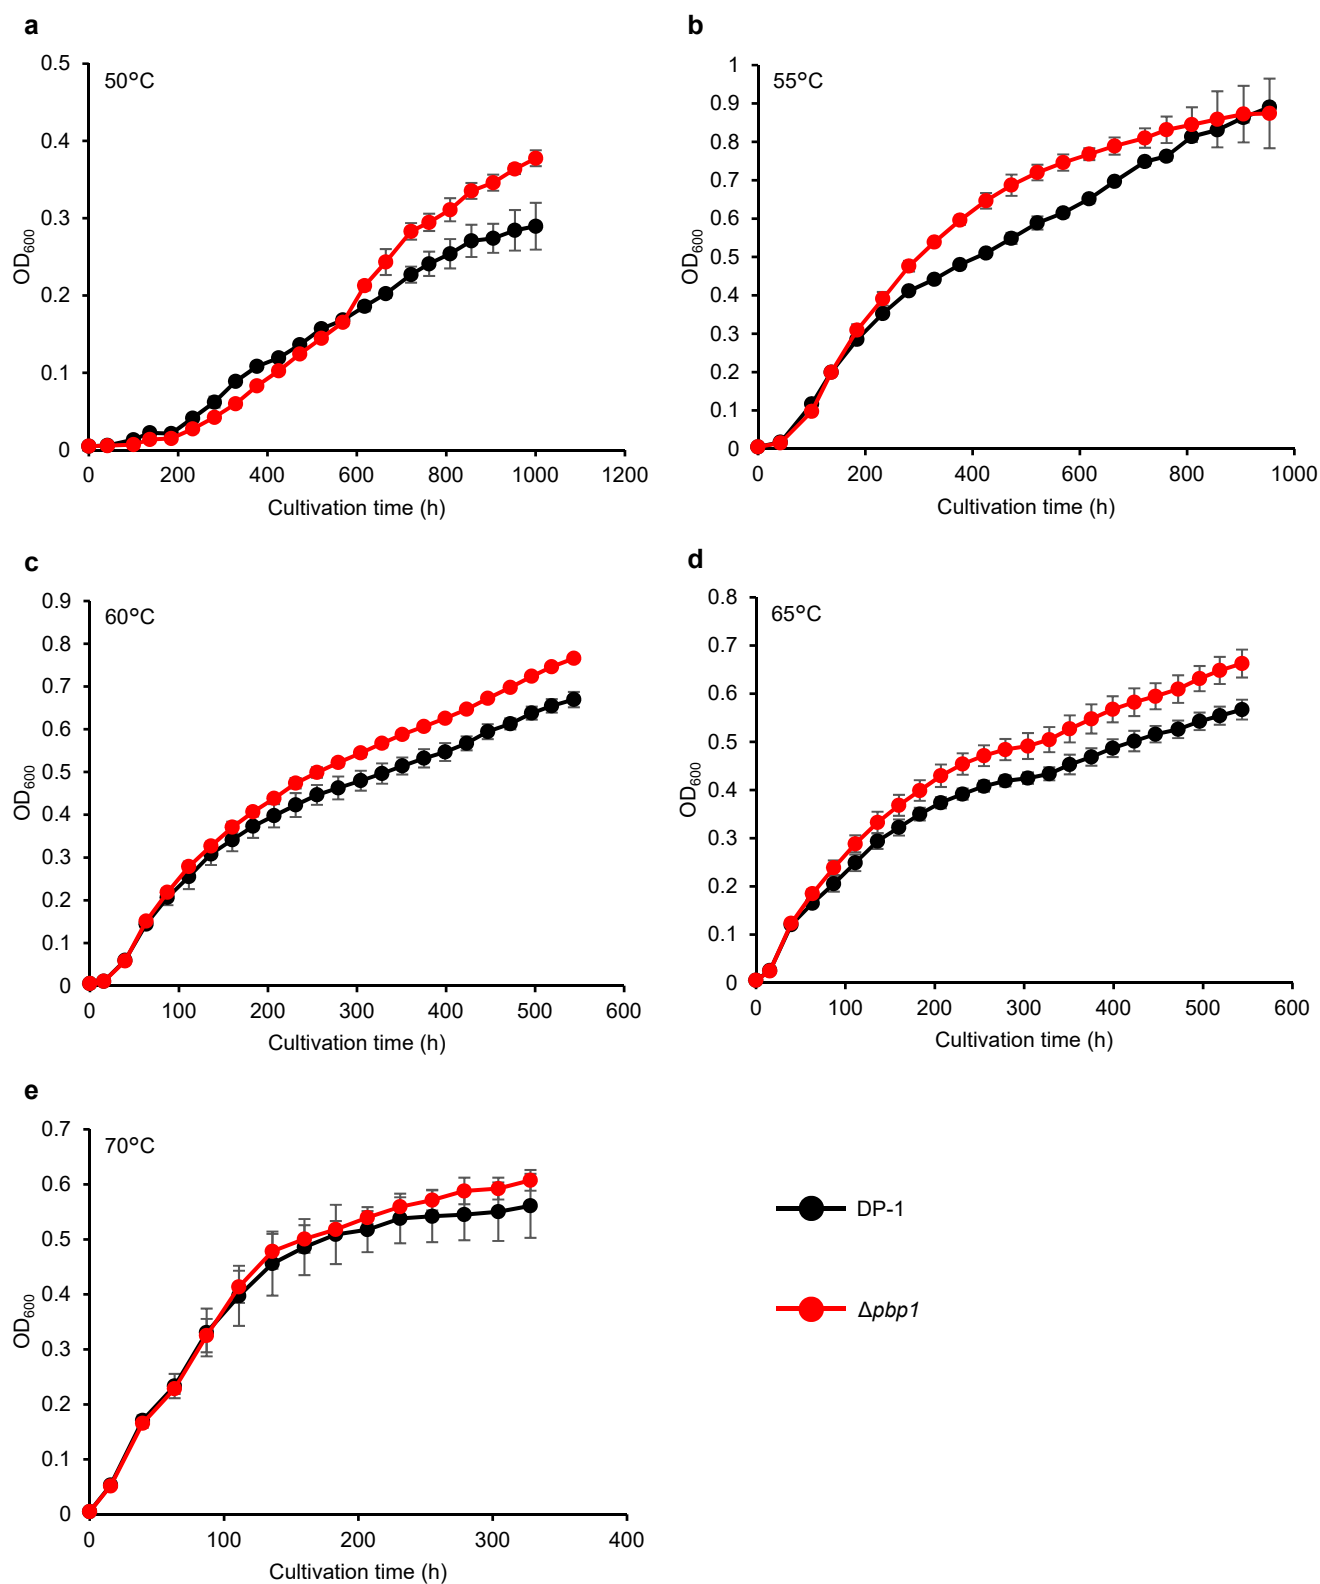

**Figure S1.** Growth curves of the *pbp1* deletion strain. Overnight cultures of the  $\Delta pbp1$  (HM-8) and DP-1 strains were inoculated into XTU liquid medium and cultivated at 50–70 °C (a–e) without shaking. The error bars indicate the mean  $\pm$  SD, calculated from triplicate experiments. Black line: the growth of DP-1; red line: the growth of  $\Delta pbp1$  (HM-8).

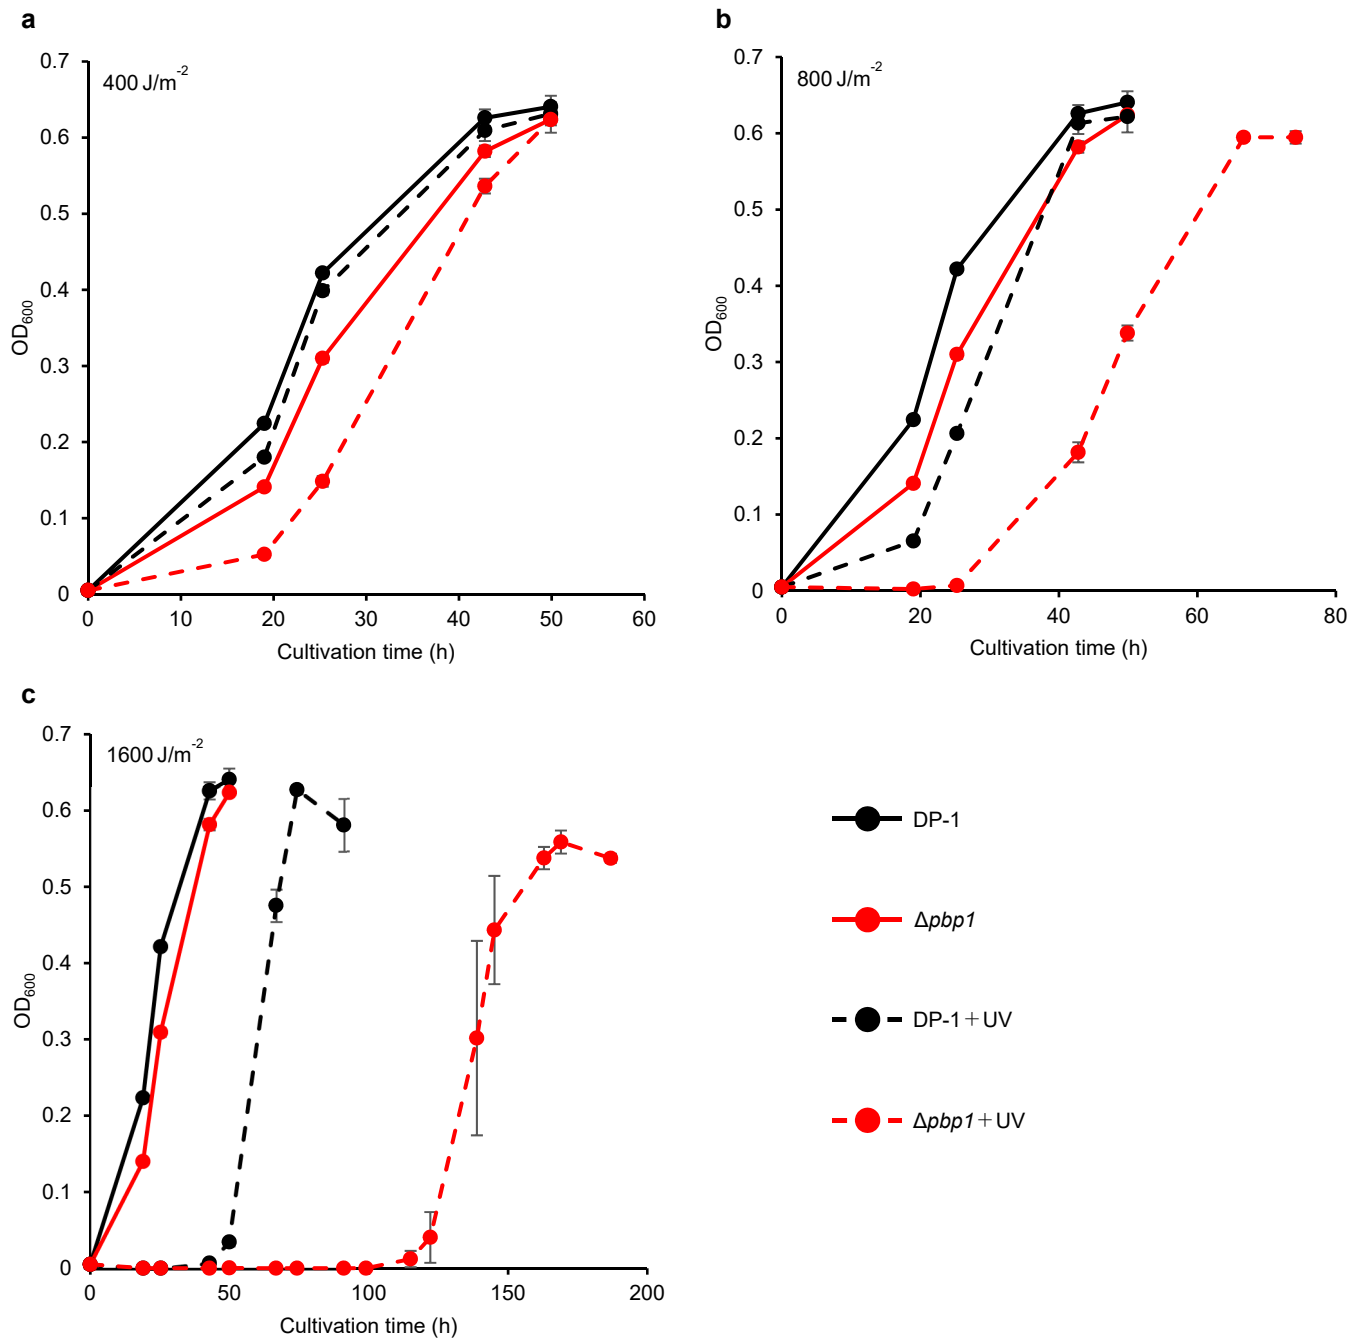

**Figure S2.** Growth of the *pbp1* deletion strain after UV-B irradiation. Overnight cultures of the  $\Delta pbp1$  (HM-8) and DP-1 strains were irradiated with UV for 20, 40, and 80 sec (400 (a), 800 (b), and 1600 J/m<sup>2</sup> (c)) and cultivated at 75 °C with shaking. +UV represents a UV-treated sample. The error bars indicate the mean  $\pm$  SD calculated from triplicate experiments. Black line: the growth of DP-1; red line: the growth of  $\Delta pbp1$  (HM-8).

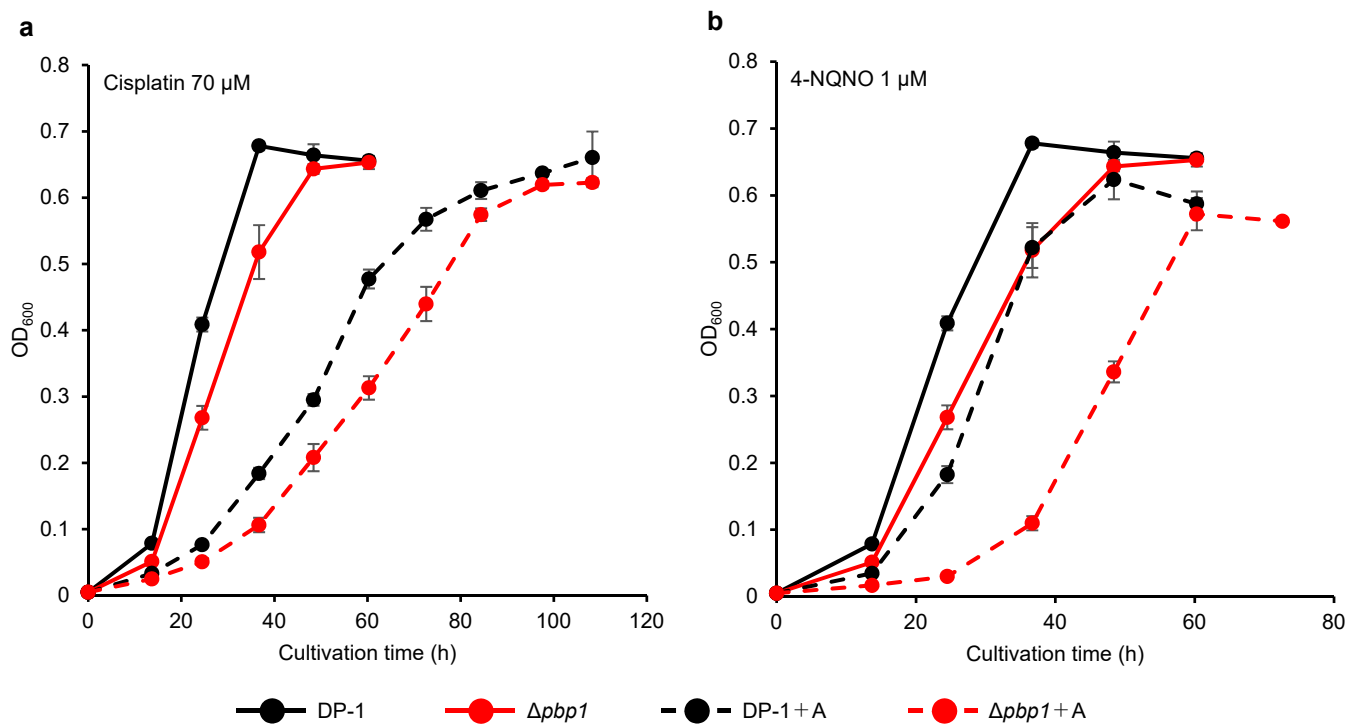

**Figure S3.** Growth of the *pbp1* deletion strain in the presence of DNA-damaging agents. Overnight cultures of the  $\Delta pbp1$  (HM-8) and DP-1 strains were inoculated into liquid medium in the presence of DNA-damaging agents (cisplatin (70  $\mu$ M (**a**)) and 4-NQNO (1  $\mu$ M (**b**)) and cultivated at 75 °C with shaking. +A represents the growth with DNA-damaging agents. The error bars indicate the mean  $\pm$  SD, calculated from triplicate experiments. Black line: the growth of DP-1; red line: the growth of  $\Delta pbp1$  (HM-8).

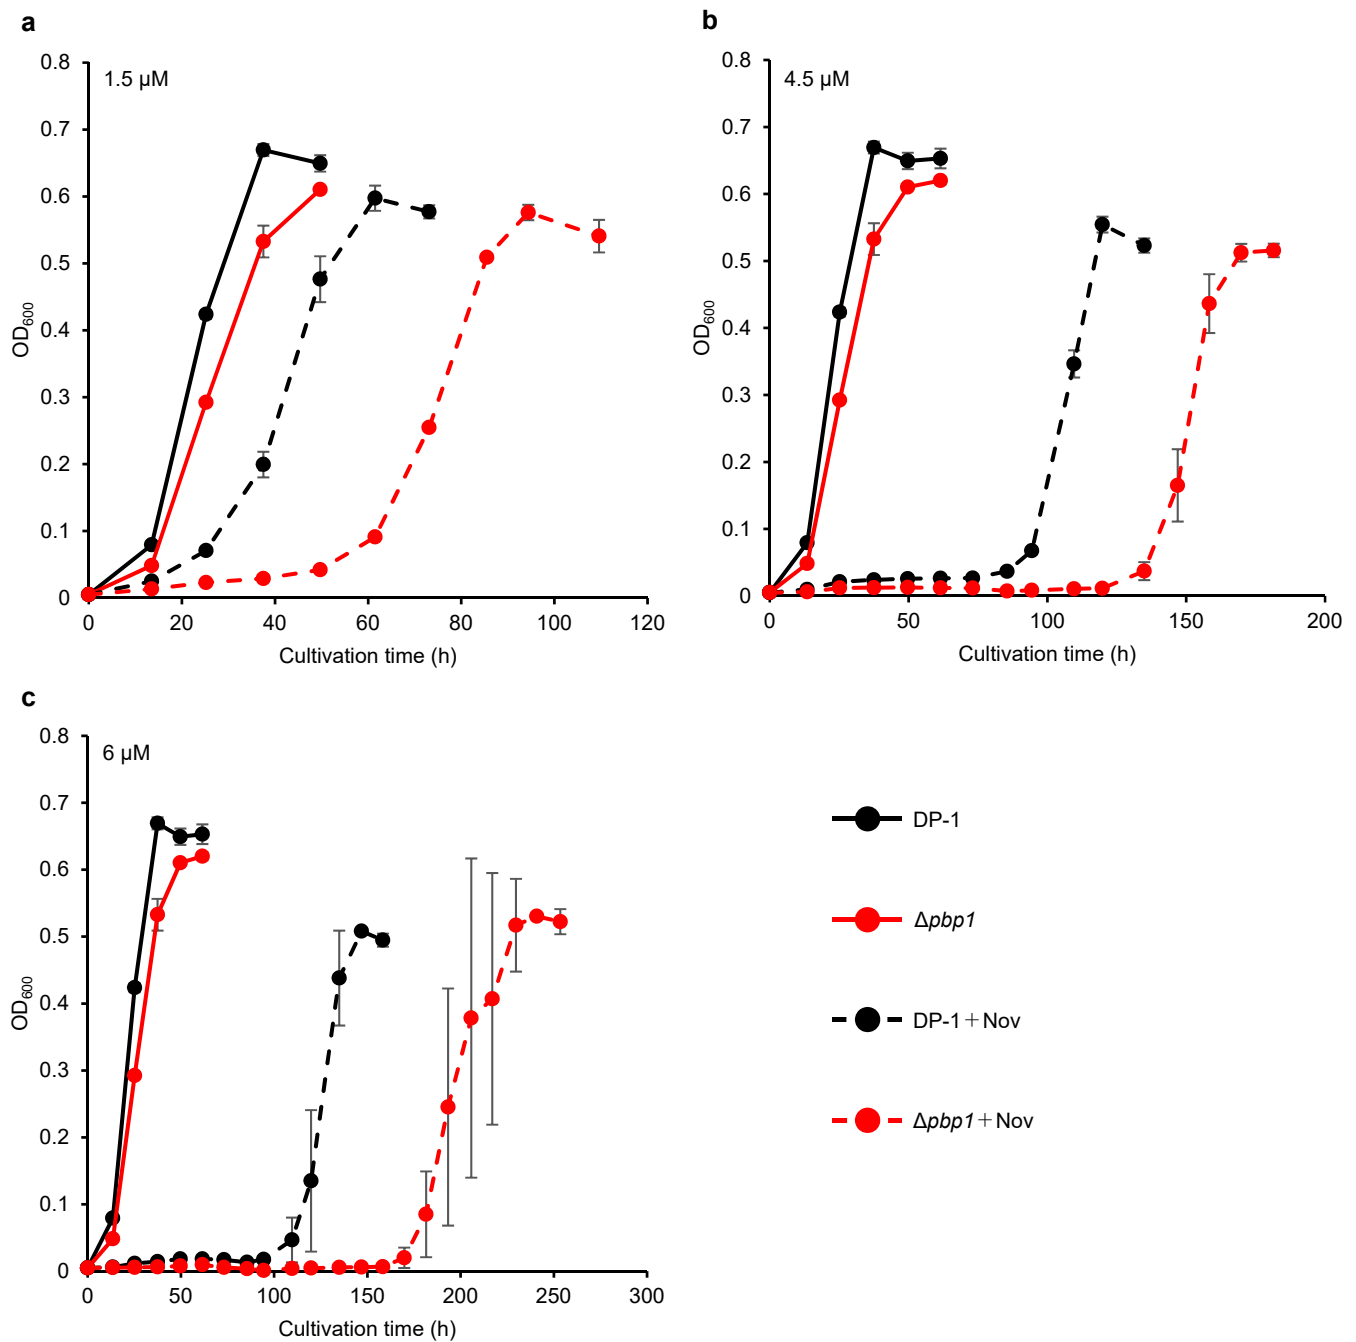

**Figure S4.** Growth of the *pbp1* deletion strain in the presence of novobiocin. Overnight cultures of the  $\Delta pbp1$  (HM-8) and *DP-1* strains were inoculated into liquid medium in the presence of novobiocin (1.5 (a), 4.5 (b), and 6  $\mu$ M (c)) and cultivated at 75 °C with shaking. +Nov represents the growth with novobiocin. The error bars indicate the mean  $\pm$  SD, calculated from triplicate experiments. Black line: the growth of *DP-1*; red line: the growth of  $\Delta pbp1$  (HM-8).

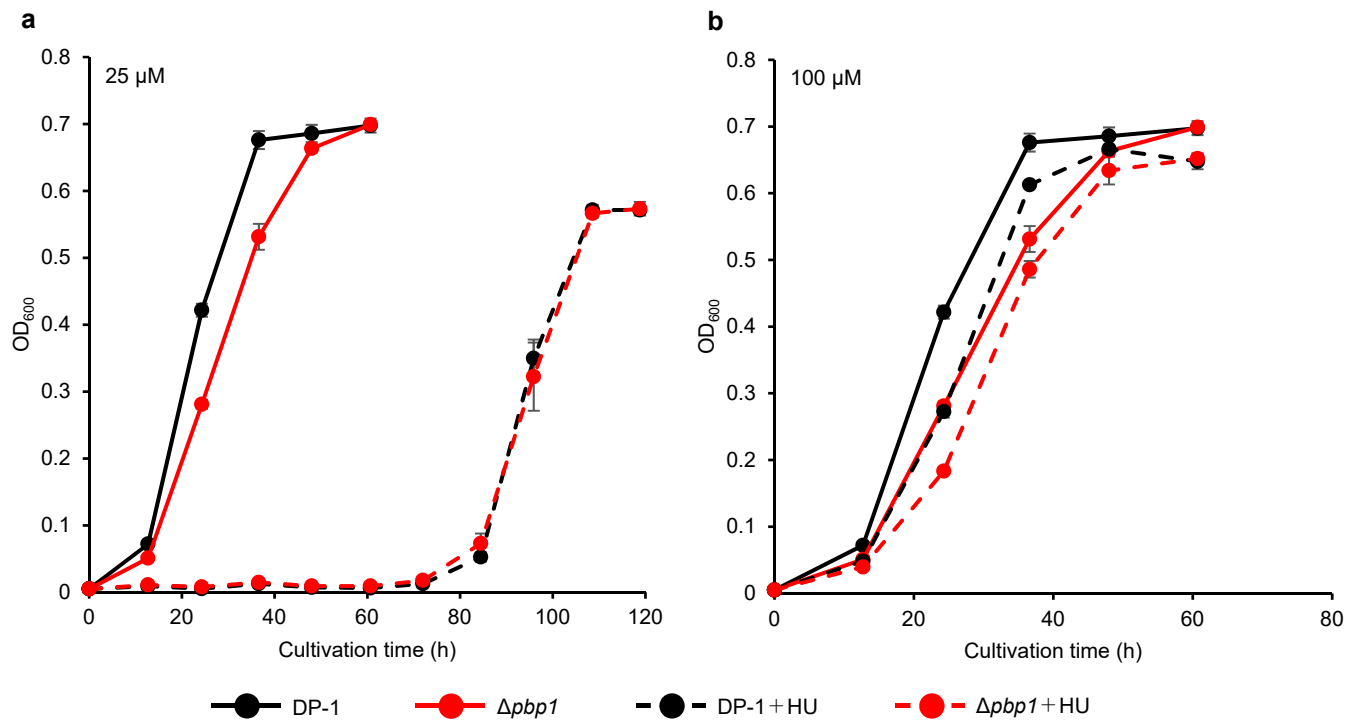

**Figure S5.** Growth of the *pbp1* deletion strain in the presence of HU. Overnight cultures of the  $\Delta pbp1$  (HM-8) and DP-1 strains were inoculated into liquid medium in the presence of HU (25 (a) and 100  $\mu$ M (b)) and cultivated at 75 °C with shaking. +HU represents the growth with HU. The error bars indicate the mean  $\pm$  SD, calculated from triplicate experiments. Black line: the growth of DP-1; red line: the growth of  $\Delta pbp1$  (HM-8).
